# Supplementary material for: Pyrotinib Targeted EGFR-STAT3/CD24 Loop-Mediated Cell Viability in TSC
Source: MDPI journal article supplement (doi:10.3390/cells11193064), 2022-09-29
Supplement: s1 [file s1]

---

*Supplementary file*

## **Pyrotinib Targeted EGFR-STAT3/CD24 Loop-Mediated Cell Viability in TSC**

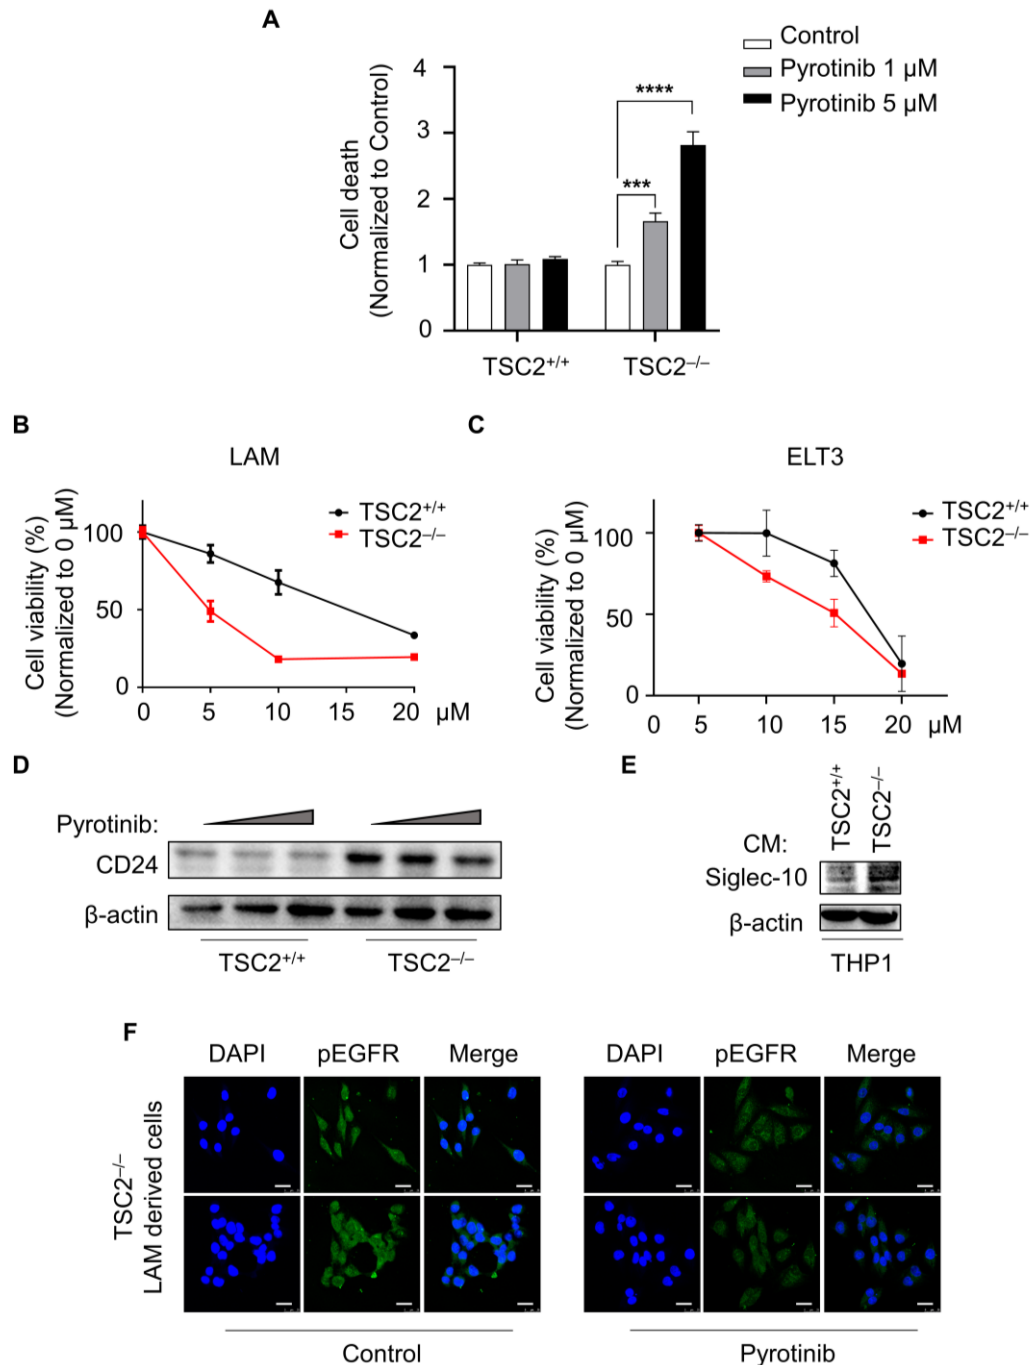

**Figure S1. Targeting efficiency of Pyrotinib in MEF/LAM/ELT3-derived cells.** **A**, MEF derived cells treated with or without pyrotinib (1  $\mu$ M or 5  $\mu$ M) for 48 h. Cell death was determined with the PI assay ( $n=5$ ). \*\*\* $P < 0.001$ , control versus pyrotinib (1  $\mu$ M). \*\*\*\* $P < 0.001$ , control versus pyrotinib (5  $\mu$ M), Student  $t$  test. **B and C**, LAM derived cells (**B**) and ELT3 derived cells (**C**) were treated with different concentration of pyrotinib for 48 h, and cell viability were detected by CCK8 assay, and IC<sub>50</sub> of LAM derived TSC2-deficient cells was 4.404  $\mu$ M, as while as 3.338  $\mu$ M in ELT3 derived TSC2-deficient cells. **D**, Immunoblot analysis of CD24 in LAM derived cells treated with or without pyrotinib (1  $\mu$ M or 5  $\mu$ M). **E**, Macrophages of THP1 was co-incubated with culture supernatant of LAM with or without TSC2-deficient cells for 6 h, and THP1 cells were lysed, and siglec-10 was detected by immunoblot. **F**,

Localization and expression of pEGFR detected by immunofluorescence staining in TSC2-deficient LAM derived cells treated with or without pyrotinib (5  $\mu$ M) (magnification 630 $\times$ , bar = 25  $\mu$ m).

| Gene Symbol  | TSC2 <sup>+/+</sup> | TSC2 <sup>-/-</sup> | Log2Fold-Change (TSC2 <sup>-/-</sup> vs. TSC2 <sup>+/+</sup> ) | Pvalue          | FDR           |
|--------------|---------------------|---------------------|----------------------------------------------------------------|-----------------|---------------|
| <b>Cd24a</b> | <b>0.2118336</b>    | <b>5.5011925</b>    | <b>5.2893589</b>                                               | <b>5.00E-05</b> | <b>0.0004</b> |
| Cd1d1        | 1.7205636           | 0.6158119           | -1.104752                                                      | 0.0316          | 0.12835       |
| Cd81         | 8.3645793           | 6.7701456           | -1.594434                                                      | 5.00E-05        | 0.0004        |
| Cd300lb      | 2.822726            | 0.0548058           | -2.76792                                                       | 0.0424          | 0.162439      |
| Cd200        | 3.8694135           | 0.802024            | -3.067389                                                      | 5.00E-05        | 0.0004        |
| H2-K1        | 0.8743655           | 1.8896489           | 1.0152835                                                      | 0.00615         | 0.0322113     |
| Ildr2        | 0.018636            | 2.5172616           | 2.4986256                                                      | 0.04235         | 0.162317      |
| Cd1d1        | 1.7205636           | 0.6158119           | -1.104752                                                      | 0.0316          | 0.12835       |
| Il6st        | 4.0059483           | 2.1793718           | -1.826577                                                      | 0.0007          | 0.0046575     |
| Igsf10       | 1.0435959           | 0.0079094           | -1.035687                                                      | 0.00705         | 0.0362655     |
| Pdgfra       | 2.53234             | 1.1211969           | -1.411143                                                      | 0.0002          | 0.0014727     |
| Tapbp        | 4.935779            | 6.4111536           | 1.4753746                                                      | 5.00E-05        | 0.0004        |
| Mr1          | 3.4339084           | 0.3484316           | -3.085477                                                      | 5.00E-05        | 0.0004        |
| Cxcl12       | 0.5216163           | 5.746977            | 5.2253606                                                      | 5.00E-05        | 0.0004        |
| Ccl20        | 0.5982164           | 4.25587             | 3.6576536                                                      | 0.00295         | 0.0169383     |
| Bmp6         | 0.0982659           | 2.5554994           | 2.4572335                                                      | 5.00E-05        | 0.0004        |

**Figure S2. Table of analysis of RNA-seq results in MEF cells.** The RNA-seq results was obtained from reference 13 (PMID: 34853810).

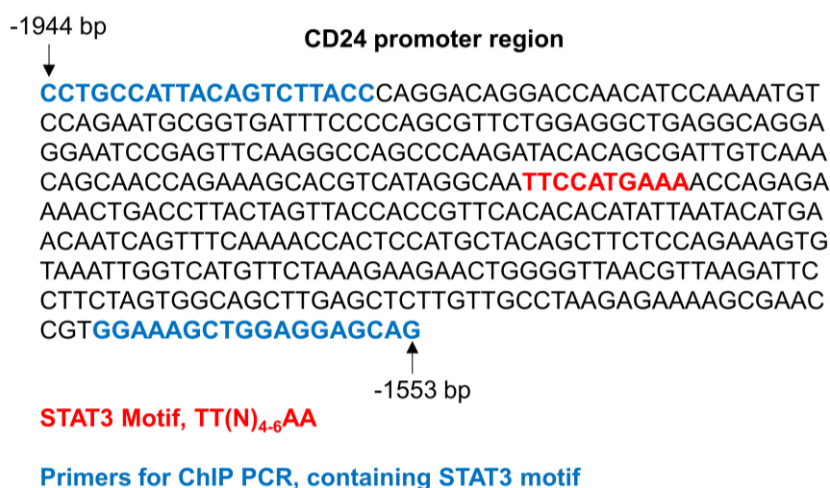

**Figure S3. ChIP PCR of CD24 promoter region designed for this study.** The full length of construct contained one important STAT3 binding motifs (-1778/-1769 bp), and primers for ChIP PCR sequence was designed by forward sequence: CCTGCCATTACAGTCTTACC and revised sequence: CTGCTCCTCCAGCTTTCC, including the promoter region of -1944/-1553

bp.

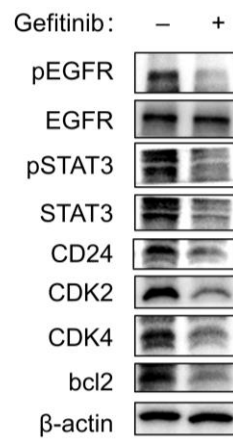

**Figure S4. Gefitinib used to validate the EGFR/STAT3/CD24 signaling.** Immunoblot analysis of MEF derived cells treated with or without Gefitinib (50 μM).

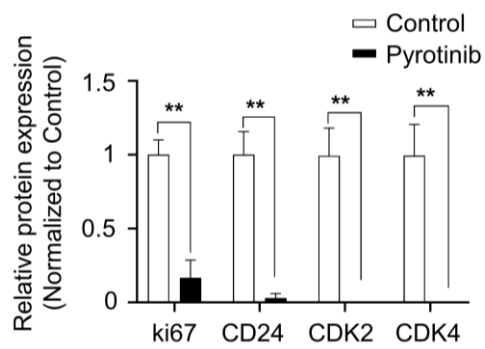

**Figure S5. Semi-quantified the proteins in Figure 5E.**
